# Supplementary material for: Evolution of communication signals and information during species radiation
Source: PubMed Central journal article supplement (PMC7532446; doi:10.1038/s41467-020-18772-3), 2020-10-02
Supplement: 41467_2020_18772_MOESM4_ESM.pdf [file 41467_2020_18772_MOESM4_ESM.pdf]

### **Description of Additional Supplementary Files**

File Name: Supplementary Data 1

Description: Raw acoustic data extracted for each of the 736 drumming recordings included in this study

File Name: Supplementary Data 2

Description: Raw morphological measurements (median values) and geographical data collected for each species in the study
